# Supplementary material for: Single-cell profiling coupled with lineage analysis reveals vagal and sacral neural crest contributions to the developing enteric nervous system
Source: eLife. 2023 Oct 25;12:e79156. doi: 10.7554/eLife.79156 (PMC10627514; doi:10.7554/eLife.79156)
Supplement: Supplementary file 2. [file elife-79156-supp2.xlsx]

## Sheet: Sheet1
cluster	Gene name	Gene stable ID	avg_log2FC	p_val_adj	GOSlim GOA Descriptions
1	PPP1R1C	ENSGALG00000008896	1.88649	0	signal transduction
1	ENSGALG00000007007	ENSGALG00000007007	1.12071	0	signal transduction
1	FRZB	ENSGALG00000002763	1.10183	0	signal transduction	cell-cell signaling
1	OLFM1	ENSGALG00000002515	0.997984	0	signal transduction
1	PHLDA2	ENSGALG00000032687	0.962715	0	signal transduction
1	VIM	ENSGALG00000008677	0.94819	5.71433e-166	signal transduction
1	JUN	ENSGALG00000010870	0.94281	1.71628e-241	signal transduction		DNA-binding transcription factor activity	transcription factor binding
1	ITGA6	ENSGALG00000034007	0.906708	0	signal transduction
1	GPC1	ENSGALG00000040316	0.836265	0	signal transduction
1	ITGB1	ENSGALG00000007145	0.819842	0	signal transduction
1	ITGB1	ENSGALG00000007145	0.819842	0		cell-cell signaling
1	MSX1	ENSGALG00000015013	0.812241	0	signal transduction		DNA-binding transcription factor activity
1	TGFBR2	ENSGALG00000011442	0.809463	0	signal transduction
1	ZEB2	ENSGALG00000040465	0.787836	0	signal transduction	cell-cell signaling	DNA-binding transcription factor activity
1	EDNRB	ENSGALG00000016912	0.785778	0	signal transduction	cell-cell signaling
1	IL1RAP	ENSGALG00000007253	0.783603	0	signal transduction	cell-cell signaling
1	ITSN1	ENSGALG00000036677	0.771615	0	signal transduction
1	PTPN13	ENSGALG00000011078	0.770206	0	signal transduction
1	SASH1	ENSGALG00000012342	0.751788	0	signal transduction
1	LTBP1	ENSGALG00000010448	0.750733	0	signal transduction
1	DAG1	ENSGALG00000037784	0.731703	0	signal transduction
1	DKK3	ENSGALG00000005551	0.722261	0	signal transduction	cell-cell signaling
1	ENSGALG00000036680	ENSGALG00000036680	0.713169	0	signal transduction
1	DLX2	ENSGALG00000039436	0.700456	0	signal transduction		DNA-binding transcription factor activity
1	DUSP7	ENSGALG00000041650	0.699505	0	signal transduction
1	SOX10	ENSGALG00000012290	0.691763	0	signal transduction	cell-cell signaling	DNA-binding transcription factor activity
1	YBX3	ENSGALG00000031890	0.688171	0	signal transduction
1	HOXB7	ENSGALG00000032740	0.67832	0			DNA-binding transcription factor activity
1	FSTL3	ENSGALG00000042356	0.657971	0	signal transduction
1	FOS	ENSGALG00000028037	0.640189	6.0913e-63	signal transduction		DNA-binding transcription factor activity	transcription factor binding
1	GNG5	ENSGALG00000027561	0.634377	0	signal transduction
1	ITGB5	ENSGALG00000029766	0.611361	0	signal transduction
1	RAB4A	ENSGALG00000036218	0.583133	0	signal transduction
1	ATOH8	ENSGALG00000033083	0.57797	0	signal transduction		DNA-binding transcription factor activity	transcription factor binding
1	TGFBR3	ENSGALG00000006038	0.573762	0	signal transduction
1	FYN	ENSGALG00000015022	0.572681	0	signal transduction	cell-cell signaling
1	DEPDC7	ENSGALG00000011681	0.568417	0	signal transduction
1	RGL1	ENSGALG00000004728	0.567846	0	signal transduction
1	DAB1	ENSGALG00000010857	0.567609	0	signal transduction
1	IL1RAPL2	ENSGALG00000008888	0.563521	0	signal transduction
1	ARHGEF10	ENSGALG00000016350	0.552128	0	signal transduction
1	LGALS3	ENSGALG00000012173	0.538586	0	signal transduction
1	SPTBN1	ENSGALG00000029512	0.533518	0	signal transduction
1	BNAS2		0.528922	0	signal transduction
1	PDGFA	ENSGALG00000003642	0.527388	0	signal transduction
1	FERMT2	ENSGALG00000012425	0.519956	0	signal transduction	cell-cell signaling
1	RASSF8	ENSGALG00000054273	0.513221	0	signal transduction
1	FGF12	ENSGALG00000036971	0.512439	3.3106e-282	signal transduction
1	FGF12	ENSGALG00000036971	0.512439	3.3106e-282		cell-cell signaling
1	ENSGALG00000015077	ENSGALG00000015077	0.502379	0	signal transduction
1	GPR37L1	ENSGALG00000000607	0.49722	0	signal transduction
1	CD81	ENSGALG00000006546	0.495067	0	signal transduction
1	CYR61	ENSGALG00000008661	0.486715	4.26728e-109	signal transduction
1	LMO4	ENSGALG00000006252	0.477151	5.48859e-248				transcription factor binding
1	AFAP1L2	ENSGALG00000008999	0.469068	0	signal transduction
1	KLF6	ENSGALG00000033178	0.461519	5.05704e-174			DNA-binding transcription factor activity
1	CTNNA1	ENSGALG00000002447	0.453938	0	signal transduction
1	CDH6	ENSGALG00000012917	0.451684	0	signal transduction
1	CFC1	ENSGALG00000012623	0.451556	1.40658e-292	signal transduction
1	YWHAQ	ENSGALG00000016433	0.450784	9.60104e-267	signal transduction
1	SOX5	ENSGALG00000032768	0.444717	0			DNA-binding transcription factor activity
1	CALR	ENSGALG00000040368	0.443741	6.7112e-230	signal transduction			transcription factor binding
1	TSPAN6	ENSGALG00000006808	0.442995	2.76353e-232	signal transduction
1	RXRG	ENSGALG00000040730	0.437574	0	signal transduction		DNA-binding transcription factor activity
1	LIMD1	ENSGALG00000035623	0.435813	2.93577e-287	signal transduction	cell-cell signaling
1	ADGRG6	ENSGALG00000013803	0.433803	0	signal transduction
1	SEMA3C	ENSGALG00000040444	0.431136	0	signal transduction
1	HDAC4	ENSGALG00000004288	0.429411	2.36139e-261	signal transduction			transcription factor binding
1	TIMP3	ENSGALG00000028627	0.425298	1.65472e-274	signal transduction
1	TAX1BP3	ENSGALG00000004618	0.425103	8.5749e-172	signal transduction	cell-cell signaling
1	ARHGAP18	ENSGALG00000031843	0.422381	6.53881e-279	signal transduction
1	NR2F2	ENSGALG00000007000	0.417979	1.59478e-242	signal transduction		DNA-binding transcription factor activity
1	NPC2	ENSGALG00000010237	0.416809	7.42592e-295	signal transduction
1	TRIB2	ENSGALG00000016457	0.406145	6.83097e-224				transcription factor binding
1	RASL11B	ENSGALG00000013948	0.405394	1.56388e-200	signal transduction
1	TPT1	ENSGALG00000028872	0.403334	0	signal transduction			transcription factor binding
1	PLXND1	ENSGALG00000008473	0.398368	0	signal transduction
1	MPC2	ENSGALG00000015437	0.398005	1.45438e-220		cell-cell signaling
1	MEF2C	ENSGALG00000014645	0.391445	0	signal transduction		DNA-binding transcription factor activity	transcription factor binding
1	PACSIN2	ENSGALG00000014159	0.390811	1.52589e-248		cell-cell signaling
1	LBH	ENSGALG00000009052	0.389337	9.13009e-166	signal transduction
1	TXNDC17	ENSGALG00000027950	0.388239	5.67605e-228	signal transduction
1	HTRA1	ENSGALG00000041140	0.386813	2.85395e-203	signal transduction
1	JAG1	ENSGALG00000009020	0.382161	4.45116e-285	signal transduction
1	MCF2L	ENSGALG00000016834	0.377829	3.05021e-253	signal transduction
1	ITGAV	ENSGALG00000002655	0.375568	3.4231e-211	signal transduction
1	DACT1	ENSGALG00000012023	0.371315	0	signal transduction	cell-cell signaling		transcription factor binding
1	ERLIN2	ENSGALG00000003092	0.370839	1.30113e-209	signal transduction
1	AHR	ENSGALG00000010836	0.368756	6.44632e-260			DNA-binding transcription factor activity
1	MAML2	ENSGALG00000017199	0.366432	3.38446e-258	signal transduction
1	RASSF9	ENSGALG00000027633	0.364087	1.07355e-226	signal transduction
1	NGF	ENSGALG00000002556	0.36335	3.76725e-270	signal transduction
1	CNP	ENSGALG00000003457	0.350566	1.83718e-195	signal transduction
1	YWHAH	ENSGALG00000006743	0.349815	1.17277e-182	signal transduction			transcription factor binding
1	NKD1	ENSGALG00000003767	0.347772	2.31714e-165	signal transduction	cell-cell signaling
1	NENF	ENSGALG00000009821	0.346707	6.00982e-210	signal transduction
1	SFRP2	ENSGALG00000009241	0.342616	2.67447e-224	signal transduction	cell-cell signaling
1	ARHGEF7	ENSGALG00000031009	0.341041	5.85337e-201	signal transduction	cell-cell signaling
1	SLC6A2	ENSGALG00000003560	0.340757	1.93267e-261		cell-cell signaling
1	VEGFC	ENSGALG00000010847	0.340679	5.62707e-251	signal transduction
1	DLX5	ENSGALG00000009129	0.339931	1.52106e-294	signal transduction	cell-cell signaling	DNA-binding transcription factor activity
1	GAB1	ENSGALG00000009898	0.337689	5.11317e-188	signal transduction
1	SIVA1	ENSGALG00000011619	0.331838	3.55118e-174	signal transduction
1	PMEPA1	ENSGALG00000037780	0.327092	8.33118e-168	signal transduction
1	CTNNAL1	ENSGALG00000013207	0.323372	3.1272e-188	signal transduction
1	SNCA	ENSGALG00000010379	0.321481	1.45823e-198	signal transduction	cell-cell signaling
1	HOXB9	ENSGALG00000001276	0.318221	0			DNA-binding transcription factor activity
1	LGMN	ENSGALG00000010811	0.317231	2.5433e-188	signal transduction	cell-cell signaling
1	LRPAP1	ENSGALG00000015612	0.31557	6.12682e-179	signal transduction
1	ETS1	ENSGALG00000001143	0.31382	5.55197e-105			DNA-binding transcription factor activity
1	ETS1	ENSGALG00000001143	0.31382	5.55197e-105				transcription factor binding
1	RNF149	ENSGALG00000016779	0.313296	4.11668e-212	signal transduction
1	P4HB	ENSGALG00000038290	0.31173	6.67052e-156	signal transduction
1	RGS7BP	ENSGALG00000027389	0.310987	1.30432e-145	signal transduction
1	MYO9B	ENSGALG00000003717	0.308395	1.37504e-172	signal transduction
1	HOXB8	ENSGALG00000040320	0.306734	2.27794e-268			DNA-binding transcription factor activity
1	GLIPR2	ENSGALG00000028821	0.306577	2.34266e-175	signal transduction
1	PTN	ENSGALG00000040493	0.306218	4.37864e-235	signal transduction	cell-cell signaling
1	DLX1	ENSGALG00000018439	0.304993	3.91262e-126	signal transduction		DNA-binding transcription factor activity
1	ENSGALG00000017065	ENSGALG00000017065	0.304828	2.6774e-195	signal transduction
1	RPS12	ENSGALG00000013990	0.303643	3.43881e-182	signal transduction	cell-cell signaling
1	RPS7	ENSGALG00000016392	0.302666	5.65774e-199	signal transduction
1	IL6ST	ENSGALG00000014716	0.296417	1.21108e-174	signal transduction
1	VLDLR	ENSGALG00000010166	0.295862	5.38009e-150	signal transduction
1	WAS	ENSGALG00000048926	0.294762	3.63597e-131	signal transduction
1	CHMP6	ENSGALG00000026428	0.294464	5.12453e-145	signal transduction
1	RPS20	ENSGALG00000014432	0.293833	2.42444e-215	signal transduction
1	AGRN	ENSGALG00000039193	0.293466	1.96695e-189	signal transduction	cell-cell signaling
1	PLPP3	ENSGALG00000010818	0.291642	2.37119e-172	signal transduction	cell-cell signaling
1	VGLL4	ENSGALG00000004937	0.290313	6.24584e-174	signal transduction
1	RPS15	ENSGALG00000015195	0.290218	1.1908e-228	signal transduction
1	RAPGEF2	ENSGALG00000020249	0.288825	3.42469e-229	signal transduction
1	JAK1	ENSGALG00000011031	0.288656	1.9045e-138	signal transduction
1	ERBB3	ENSGALG00000033510	0.283739	2.31576e-240	signal transduction
1	ARHGAP12	ENSGALG00000007254	0.283574	2.70949e-193	signal transduction
1	OXSR1	ENSGALG00000005979	0.283155	8.2097e-150	signal transduction
1	ENSGALG00000042339	ENSGALG00000042339	0.282906	1.42382e-212	signal transduction
1	FZD4	ENSGALG00000017242	0.28288	7.97479e-154	signal transduction	cell-cell signaling
1	SIPA1L1	ENSGALG00000009381	0.282794	2.15043e-212	signal transduction
1	GRAMD4	ENSGALG00000034274	0.281589	4.09439e-160	signal transduction
1	PDIA3	ENSGALG00000008348	0.281372	1.50251e-130	signal transduction
1	EGR1	ENSGALG00000007669	0.281168	3.76039e-29	signal transduction	cell-cell signaling	DNA-binding transcription factor activity
1	ANGPTL1	ENSGALG00000004290	0.272036	8.18465e-156	signal transduction
1	TSPAN14	ENSGALG00000002414	0.270414	4.693e-182	signal transduction
1	CTGF		0.268253	3.42087e-73	signal transduction
1	RAC1	ENSGALG00000007130	0.26693	2.8705e-132	signal transduction
1	RPL37	ENSGALG00000014833	0.264421	3.24459e-144	signal transduction
1	PPP1R12A	ENSGALG00000010325	0.261599	1.76004e-129	signal transduction
1	RAP1B	ENSGALG00000009927	0.260673	3.9709e-92	signal transduction
1	RAP1B	ENSGALG00000009927	0.260673	3.9709e-92		cell-cell signaling
1	ASB5	ENSGALG00000010837	0.260151	5.73619e-147	signal transduction
1	TSKU	ENSGALG00000000761	0.259549	2.60897e-124	signal transduction	cell-cell signaling
1	TNFSF10	ENSGALG00000009179	0.258934	1.35339e-117	signal transduction
1	PARP1	ENSGALG00000009228	0.258068	5.75003e-112				transcription factor binding
1	RELN	ENSGALG00000008193	0.257824	1.98901e-131	signal transduction	cell-cell signaling
1	RASSF1	ENSGALG00000038951	0.255725	1.16879e-156	signal transduction
1	SFRP5	ENSGALG00000007515	0.255692	3.8015e-108	signal transduction	cell-cell signaling
1	RPL22	ENSGALG00000000719	0.252852	1.39011e-141		cell-cell signaling
1	HADH	ENSGALG00000016124	0.251987	4.32648e-129		cell-cell signaling
1	ACTB	ENSGALG00000009621	0.251385	5.28718e-153				transcription factor binding
1	PRKCD	ENSGALG00000002016	0.250509	8.4123e-157	signal transduction
1	IGSF11	ENSGALG00000015084	0.25041	2.24041e-245		cell-cell signaling
1	DTNBP1	ENSGALG00000012703	0.250182	4.02813e-107	signal transduction
1	DTNBP1	ENSGALG00000012703	0.250182	4.02813e-107		cell-cell signaling
6	FABP7	ENSGALG00000038933	2.96462	0				transcription factor binding
6	SFRP1	ENSGALG00000003473	2.75068	0	signal transduction	cell-cell signaling
6	VLDLR	ENSGALG00000010166	2.49344	0	signal transduction
6	CYR61	ENSGALG00000008661	2.18622	3.554e-272	signal transduction
6	JUN	ENSGALG00000010870	1.96377	2.66856e-253	signal transduction		DNA-binding transcription factor activity	transcription factor binding
6	RELN	ENSGALG00000008193	1.94347	0	signal transduction	cell-cell signaling
6	ENSGALG00000028041	ENSGALG00000028041	1.71958	0	signal transduction	cell-cell signaling
6	MBP	ENSGALG00000013640	1.70755	0	signal transduction
6	CNTN2	ENSGALG00000000653	1.68289	0	signal transduction	cell-cell signaling
6	FOS	ENSGALG00000028037	1.66192	1.92398e-78	signal transduction		DNA-binding transcription factor activity	transcription factor binding
6	HES5	ENSGALG00000001141	1.61985	8.53843e-81	signal transduction		DNA-binding transcription factor activity
6	EGF	ENSGALG00000012155	1.53271	0	signal transduction	cell-cell signaling
6	TIMP3	ENSGALG00000028627	1.46878	0	signal transduction
6	NR2F2	ENSGALG00000007000	1.42566	0	signal transduction		DNA-binding transcription factor activity
6	ITSN1	ENSGALG00000036677	1.35816	0	signal transduction
6	HMGCR	ENSGALG00000014948	1.34088	0	signal transduction
6	LFNG	ENSGALG00000038515	1.32959	0	signal transduction
6	RASSF9	ENSGALG00000027633	1.30959	0	signal transduction
6	INSIG1	ENSGALG00000017394	1.30009	1.16339e-196	signal transduction
6	MMD2	ENSGALG00000004530	1.25967	0	signal transduction
6	CIB1		1.24161	0	signal transduction
6	PPP1R1C	ENSGALG00000008896	1.20149	0	signal transduction
6	CTGF		1.19827	3.75249e-124	signal transduction
6	SEC14L1	ENSGALG00000001684	1.18449	0	signal transduction
6	GPC4	ENSGALG00000006080	1.17284	0	signal transduction	cell-cell signaling
6	PHLDA2	ENSGALG00000032687	1.16606	5.54734e-109	signal transduction
6	GPC1	ENSGALG00000040316	1.14395	0	signal transduction
6	PTN	ENSGALG00000040493	1.1248	0	signal transduction	cell-cell signaling
6	TGFBR2	ENSGALG00000011442	1.12182	0	signal transduction
6	TNC	ENSGALG00000039990	1.1167	0		cell-cell signaling
6	EFNB1	ENSGALG00000036539	1.10895	0	signal transduction
6	TRABD2B	ENSGALG00000027655	1.07808	0	signal transduction	cell-cell signaling
6	LGMN	ENSGALG00000010811	1.06211	0	signal transduction	cell-cell signaling
6	EDNRB	ENSGALG00000016912	1.03632	0	signal transduction	cell-cell signaling
6	EGR1	ENSGALG00000007669	1.02392	5.8419e-102	signal transduction	cell-cell signaling	DNA-binding transcription factor activity
6	HOXB7	ENSGALG00000032740	1.01717	0			DNA-binding transcription factor activity
6	DKK3	ENSGALG00000005551	1.01234	7.51328e-269	signal transduction	cell-cell signaling
6	KLF6	ENSGALG00000033178	0.973825	6.76418e-152			DNA-binding transcription factor activity
6	LIFR	ENSGALG00000003733	0.967802	0	signal transduction
6	FRZB	ENSGALG00000002763	0.956195	0	signal transduction	cell-cell signaling
6	CD81	ENSGALG00000006546	0.904683	0	signal transduction
6	GRIK3	ENSGALG00000002098	0.901924	0	signal transduction
6	CDH11	ENSGALG00000039985	0.901482	0		cell-cell signaling
6	LTBP1	ENSGALG00000010448	0.881833	1.61375e-261	signal transduction
6	PLPP3	ENSGALG00000010818	0.875826	1.45608e-276	signal transduction	cell-cell signaling
6	DAB1	ENSGALG00000010857	0.871191	0	signal transduction
6	FZD4	ENSGALG00000017242	0.866345	2.13679e-230	signal transduction	cell-cell signaling
6	HEYL	ENSGALG00000034986	0.835557	7.99654e-268	signal transduction		DNA-binding transcription factor activity
6	ARHGEF10	ENSGALG00000016350	0.826585	0	signal transduction
6	SGK3	ENSGALG00000043570	0.821597	0	signal transduction
6	VIM	ENSGALG00000008677	0.808467	5.86572e-183	signal transduction
6	SNCA	ENSGALG00000010379	0.805718	6.69227e-249	signal transduction	cell-cell signaling
6	LPAR1	ENSGALG00000015729	0.803471	0	signal transduction
6	KAT2B	ENSGALG00000011278	0.798963	0				transcription factor binding
6	ITGA6	ENSGALG00000034007	0.776812	9.97797e-265	signal transduction
6	RGS7BP	ENSGALG00000027389	0.774189	0	signal transduction
6	GADD45B	ENSGALG00000029968	0.750496	2.6706e-88	signal transduction
6	RAMP3	ENSGALG00000037246	0.749485	0	signal transduction
6	ENO1	ENSGALG00000002377	0.701619	2.62323e-188	signal transduction		DNA-binding transcription factor activity	transcription factor binding
6	RASL11B	ENSGALG00000013948	0.701153	5.83845e-91	signal transduction
6	RASSF2	ENSGALG00000030432	0.70109	7.30707e-199	signal transduction
6	PREX2	ENSGALG00000042354	0.697638	2.35852e-226	signal transduction
6	HTRA1	ENSGALG00000041140	0.69171	0	signal transduction
6	RAP1B	ENSGALG00000009927	0.687992	9.48777e-164	signal transduction
6	RAP1B	ENSGALG00000009927	0.687992	9.48777e-164		cell-cell signaling
6	NDRG1	ENSGALG00000054783	0.687818	1.69809e-207	signal transduction
6	TIAM1	ENSGALG00000015842	0.678647	0	signal transduction
6	RAPGEF2	ENSGALG00000020249	0.677172	1.78863e-224	signal transduction
6	SOX10	ENSGALG00000012290	0.673975	5.86904e-203	signal transduction	cell-cell signaling	DNA-binding transcription factor activity
6	RGL1	ENSGALG00000004728	0.667264	2.47197e-200	signal transduction
6	WAS	ENSGALG00000048926	0.666302	4.36216e-178	signal transduction
6	LMO4	ENSGALG00000006252	0.659593	5.03083e-181				transcription factor binding
6	SNX3	ENSGALG00000015304	0.657507	1.20692e-163	signal transduction	cell-cell signaling
6	MYO6	ENSGALG00000015898	0.647025	1.14328e-221	signal transduction
6	NOTCH1	ENSGALG00000002375	0.640191	1.19546e-188	signal transduction
6	NOTCH1	ENSGALG00000002375	0.640191	1.19546e-188		cell-cell signaling
6	ADAMTS20	ENSGALG00000009572	0.640009	0	signal transduction
6	GNG5	ENSGALG00000027561	0.638465	2.16141e-199	signal transduction
6	DEPDC7	ENSGALG00000011681	0.629487	4.58866e-170	signal transduction
6	TFAP2A	ENSGALG00000012775	0.625722	1.71411e-168			DNA-binding transcription factor activity
6	ENSGALG00000027159	ENSGALG00000027159	0.62039	3.92434e-264	signal transduction
6	ITGB8	ENSGALG00000010875	0.616745	1.03053e-251	signal transduction
6	ARHGAP5	ENSGALG00000009992	0.60659	2.95099e-165	signal transduction
6	IGSF11	ENSGALG00000015084	0.603529	0		cell-cell signaling
6	FERMT2	ENSGALG00000012425	0.59836	1.31893e-163	signal transduction	cell-cell signaling
6	DACT1	ENSGALG00000012023	0.594574	3.29112e-219	signal transduction	cell-cell signaling		transcription factor binding
6	GPR37L1	ENSGALG00000000607	0.583494	5.00742e-189	signal transduction
6	PAG1	ENSGALG00000034188	0.579165	1.28281e-172	signal transduction
6	TCF7L2	ENSGALG00000008883	0.571544	4.97286e-162	signal transduction	cell-cell signaling	DNA-binding transcription factor activity	transcription factor binding
6	ITGB5	ENSGALG00000029766	0.558401	1.69432e-143	signal transduction
6	PLXND1	ENSGALG00000008473	0.543465	8.57247e-219	signal transduction
6	SPTBN1	ENSGALG00000029512	0.534838	1.58002e-180	signal transduction
6	SRGAP1	ENSGALG00000009825	0.522467	1.44573e-138	signal transduction
6	LGALS3	ENSGALG00000012173	0.522349	4.74944e-177	signal transduction
6	NPC2	ENSGALG00000010237	0.51341	1.01591e-132	signal transduction
6	PDGFA	ENSGALG00000003642	0.508526	1.7862e-126	signal transduction
6	DUSP1	ENSGALG00000040360	0.495761	6.24284e-30	signal transduction
6	SOX2	ENSGALG00000043460	0.493397	7.05963e-150	signal transduction	cell-cell signaling	DNA-binding transcription factor activity
6	ADGRG6	ENSGALG00000013803	0.480196	3.5162e-135	signal transduction
6	BNAS2		0.477847	2.55764e-106	signal transduction
6	RAB5A	ENSGALG00000011272	0.476314	6.99236e-96	signal transduction	cell-cell signaling
6	VEGFC	ENSGALG00000010847	0.472226	6.03627e-149	signal transduction
6	DAG1	ENSGALG00000037784	0.471544	1.93096e-104	signal transduction
6	RNF13	ENSGALG00000010411	0.467851	9.12817e-104	signal transduction
6	FIBIN	ENSGALG00000023904	0.46588	9.80872e-212	signal transduction
6	ANXA6	ENSGALG00000004357	0.463433	1.94649e-102	signal transduction
6	LRRC4C	ENSGALG00000007948	0.461738	2.0182e-164		cell-cell signaling
6	WBP1L	ENSGALG00000041010	0.458359	9.54943e-105	signal transduction
6	IGFBP4	ENSGALG00000040672	0.457518	9.65766e-102	signal transduction
6	AHR	ENSGALG00000010836	0.456709	2.12716e-131			DNA-binding transcription factor activity
6	SOD1	ENSGALG00000015844	0.454908	6.07436e-94	signal transduction
6	TWSG1	ENSGALG00000052629	0.445649	1.43806e-91	signal transduction
6	MPC2	ENSGALG00000015437	0.44158	6.72198e-80		cell-cell signaling
6	ROCK2	ENSGALG00000016451	0.436994	1.03589e-70	signal transduction
6	SFRP5	ENSGALG00000007515	0.43608	1.00382e-244	signal transduction	cell-cell signaling
6	ENSGALG00000040886	ENSGALG00000040886	0.427389	3.63721e-110			DNA-binding transcription factor activity
6	FSTL3	ENSGALG00000042356	0.426906	3.10439e-103	signal transduction
6	SIVA1	ENSGALG00000011619	0.424712	3.71005e-82	signal transduction
6	ACTB	ENSGALG00000009621	0.422045	7.25789e-166				transcription factor binding
6	HMGN3		0.419092	7.6775e-82		cell-cell signaling
6	TSPAN6	ENSGALG00000006808	0.417902	5.57479e-74	signal transduction
6	SERINC3	ENSGALG00000004220	0.409412	2.81885e-73	signal transduction
6	GRK5	ENSGALG00000009403	0.399124	4.46803e-113	signal transduction
6	P4HB	ENSGALG00000038290	0.394581	5.23742e-73	signal transduction
6	ENSGALG00000040546	ENSGALG00000040546	0.390067	3.30072e-114			DNA-binding transcription factor activity
6	ANGPTL1	ENSGALG00000004290	0.389985	1.51698e-95	signal transduction
6	ARHGAP42	ENSGALG00000017196	0.387175	6.24302e-96	signal transduction
6	SLC6A2	ENSGALG00000003560	0.384975	2.69487e-145		cell-cell signaling
6	TGFB3	ENSGALG00000010346	0.38339	2.76273e-76	signal transduction
6	PLEKHF1	ENSGALG00000004474	0.381961	1.12549e-114	signal transduction
6	ARHGAP12	ENSGALG00000007254	0.381891	1.30321e-77	signal transduction
6	NLGN4X		0.38034	5.70037e-86		cell-cell signaling
6	AP3B1	ENSGALG00000004390	0.378679	1.31643e-69	signal transduction
6	LIMD1	ENSGALG00000035623	0.378589	1.36911e-72	signal transduction	cell-cell signaling
6	CTNNA1	ENSGALG00000002447	0.378225	5.27309e-64	signal transduction
6	TMEM14A	ENSGALG00000019894	0.370857	1.67758e-57	signal transduction
6	HOXA9	ENSGALG00000028983	0.370295	8.4799e-105			DNA-binding transcription factor activity
6	ITGB1	ENSGALG00000007145	0.36838	1.28601e-90	signal transduction
6	ITGB1	ENSGALG00000007145	0.36838	1.28601e-90		cell-cell signaling
6	NKD1	ENSGALG00000003767	0.367834	2.59296e-94	signal transduction	cell-cell signaling
6	PACSIN2	ENSGALG00000014159	0.366919	7.93377e-79		cell-cell signaling
6	KRAS	ENSGALG00000030943	0.365227	2.96237e-54	signal transduction	cell-cell signaling
6	ENSGALG00000034050	ENSGALG00000034050	0.360929	4.74907e-56	signal transduction
6	PARP1	ENSGALG00000009228	0.35583	6.11355e-62				transcription factor binding
6	LRPAP1	ENSGALG00000015612	0.355621	8.49257e-58	signal transduction
6	LAMP1	ENSGALG00000037697	0.354123	1.66181e-47	signal transduction
6	DOCK1	ENSGALG00000042259	0.353234	2.8263e-74	signal transduction
6	RCAN3	ENSGALG00000004282	0.345529	6.3807e-53	signal transduction
6	CGNL1	ENSGALG00000004294	0.34468	8.39872e-107	signal transduction
6	GAPDH	ENSGALG00000014442	0.342672	8.48288e-87	signal transduction
6	ANK3	ENSGALG00000003135	0.341324	4.66216e-99	signal transduction
6	MAPK9	ENSGALG00000039099	0.340878	6.50398e-62	signal transduction
6	ZEB2	ENSGALG00000040465	0.338464	1.90265e-62	signal transduction	cell-cell signaling	DNA-binding transcription factor activity
6	PTPN12	ENSGALG00000051957	0.338426	4.01606e-49	signal transduction
6	IRF8	ENSGALG00000005757	0.335416	8.16944e-60			DNA-binding transcription factor activity
6	LEF1	ENSGALG00000031960	0.335292	2.23227e-135	signal transduction	cell-cell signaling	DNA-binding transcription factor activity	transcription factor binding
6	ERLIN2	ENSGALG00000003092	0.33177	5.02266e-51	signal transduction
6	AFF3	ENSGALG00000016767	0.331436	1.87694e-168			DNA-binding transcription factor activity
6	DHH	ENSGALG00000031707	0.323956	1.26263e-272	signal transduction	cell-cell signaling
6	SCAP	ENSGALG00000035768	0.32108	4.69035e-54	signal transduction
6	NCALD	ENSGALG00000032518	0.31995	3.4892e-47	signal transduction
6	FBXO9	ENSGALG00000016320	0.315884	5.94913e-47	signal transduction
6	ZFP36L2	ENSGALG00000033129	0.313886	7.99721e-69	signal transduction
6	HOXA6	ENSGALG00000028908	0.313817	1.54977e-92			DNA-binding transcription factor activity
6	JAG1	ENSGALG00000009020	0.311046	4.87898e-72	signal transduction
6	SKI	ENSGALG00000001229	0.309361	1.26956e-39	signal transduction		DNA-binding transcription factor activity	transcription factor binding
6	NRARP	ENSGALG00000027231	0.297549	2.02581e-159	signal transduction	cell-cell signaling
6	ARRDC3	ENSGALG00000025915	0.292506	1.34704e-22	signal transduction
6	PSCA	ENSGALG00000045875	0.291338	9.62065e-200	signal transduction
6	FARP2	ENSGALG00000005788	0.29103	1.04235e-66	signal transduction
6	ARHGAP29	ENSGALG00000005683	0.289999	6.31797e-49	signal transduction
6	PRNP	ENSGALG00000000209	0.288679	2.89027e-27	signal transduction
6	PLXNB2	ENSGALG00000039861	0.286269	1.54478e-50	signal transduction
6	HDAC4	ENSGALG00000004288	0.285474	3.17278e-42	signal transduction			transcription factor binding
6	DDR2	ENSGALG00000039322	0.284435	6.83728e-77	signal transduction
6	CALR	ENSGALG00000040368	0.283476	2.99599e-32	signal transduction			transcription factor binding
6	CYBA	ENSGALG00000029367	0.278126	2.49745e-38	signal transduction
6	BANK1	ENSGALG00000012292	0.277563	5.13588e-258	signal transduction
6	SYT9	ENSGALG00000005265	0.275583	3.53689e-71		cell-cell signaling
6	GNA12	ENSGALG00000052837	0.2718	1.39912e-37	signal transduction
6	PMEPA1	ENSGALG00000037780	0.271352	7.26053e-36	signal transduction
6	SREBF1	ENSGALG00000027188	0.270344	7.36902e-56	signal transduction	cell-cell signaling	DNA-binding transcription factor activity	transcription factor binding
6	FZD3	ENSGALG00000042308	0.26815	3.76241e-45	signal transduction	cell-cell signaling
6	IQGAP1	ENSGALG00000030162	0.266563	5.58396e-33	signal transduction
6	CHMP6	ENSGALG00000026428	0.264443	9.12478e-30	signal transduction
6	ROR1	ENSGALG00000011019	0.264338	1.0883e-65	signal transduction	cell-cell signaling
6	HOXC6	ENSGALG00000039051	0.264056	2.26195e-81			DNA-binding transcription factor activity
6	PLCD1	ENSGALG00000005805	0.263261	5.79071e-39	signal transduction
6	GPR162	ENSGALG00000022926	0.261199	1.09286e-27	signal transduction
6	SDE2	ENSGALG00000009253	0.261079	4.16206e-26	signal transduction
6	PRDM16	ENSGALG00000036728	0.259552	1.45514e-161	signal transduction		DNA-binding transcription factor activity	transcription factor binding
6	SREBF2	ENSGALG00000041687	0.2594	9.68791e-23	signal transduction		DNA-binding transcription factor activity
6	LSS	ENSGALG00000006198	0.2584	2.04546e-46	signal transduction
6	ZFP36L1	ENSGALG00000039228	0.2561	3.22439e-41	signal transduction
6	SUFU	ENSGALG00000008096	0.255342	4.53595e-34	signal transduction			transcription factor binding
6	SHISA3	ENSGALG00000045153	0.255214	0	signal transduction	cell-cell signaling
6	ADAM10	ENSGALG00000004212	0.254377	4.85848e-45	signal transduction
6	RHEB	ENSGALG00000039880	0.254026	3.72304e-34	signal transduction
6	ENSGALG00000048883	ENSGALG00000048883	0.253743	9.30176e-24	signal transduction
6	ERBB2	ENSGALG00000031529	0.253678	5.74612e-38	signal transduction
6	CTNS	ENSGALG00000004628	0.253568	3.09884e-41	signal transduction
6	FAIM	ENSGALG00000012082	0.253255	1.95729e-34	signal transduction
6	GCLM	ENSGALG00000005782	0.251289	7.36107e-34	signal transduction
6	NENF	ENSGALG00000009821	0.251025	3.51005e-28	signal transduction
6	AFAP1L2	ENSGALG00000008999	0.250043	3.71932e-34	signal transduction
6	TUB	ENSGALG00000005986	0.250005	4.56126e-54	signal transduction
8	CENPF	ENSGALG00000009690	2.50563	0				transcription factor binding
8	ASPM	ENSGALG00000032398	2.33586	0	signal transduction	cell-cell signaling
8	CDK1	ENSGALG00000003085	2.16641	0	signal transduction
8	HMGB2	ENSGALG00000010745	1.99324	0	signal transduction			transcription factor binding
8	CDC20	ENSGALG00000009971	1.69975	0		cell-cell signaling
8	BUB1B	ENSGALG00000036892	1.54893	0	signal transduction
8	NDC80	ENSGALG00000014801	1.50732	0	signal transduction
8	PLK1	ENSGALG00000006110	1.41965	0	signal transduction
8	RACGAP1	ENSGALG00000033231	1.41131	0	signal transduction
8	NUCKS1	ENSGALG00000000708	1.27817	0				transcription factor binding
8	PBK	ENSGALG00000016582	1.13888	0	signal transduction
8	MAD2L1	ENSGALG00000011967	1.13375	0	signal transduction
8	HMGB1	ENSGALG00000042875	1.10828	0	signal transduction
8	ECT2	ENSGALG00000009157	1.10534	0	signal transduction
8	BUB1	ENSGALG00000008233	1.10534	0	signal transduction
8	FABP7	ENSGALG00000038933	1.06298	4.16e-135				transcription factor binding
8	SFRP1	ENSGALG00000003473	1.00432	1.91e-86	signal transduction	cell-cell signaling
8	CEP55	ENSGALG00000006639	0.976637	0	signal transduction
8	BRCA1	ENSGALG00000002781	0.973192	0	signal transduction
8	TTK	ENSGALG00000015874	0.946576	0	signal transduction
8	ARHGAP11A		0.93302	0	signal transduction
8	TRIM59	ENSGALG00000023571	0.850875	0	signal transduction
8	RANGAP1	ENSGALG00000011966	0.805425	4.88e-232	signal transduction
8	ARHGAP19	ENSGALG00000007609	0.804809	0	signal transduction
8	PPP1R1C	ENSGALG00000008896	0.793618	1.33e-197	signal transduction
8	FOXM1	ENSGALG00000013420	0.760838	0	signal transduction		DNA-binding transcription factor activity
8	GNAI3	ENSGALG00000041700	0.756889	3.6e-145	signal transduction
8	EZH2	ENSGALG00000043399	0.75023	7.38e-174	signal transduction			transcription factor binding
8	PCNT	ENSGALG00000007021	0.726752	2.2e-161	signal transduction
8	EDNRB	ENSGALG00000016912	0.701725	4.33e-112	signal transduction	cell-cell signaling
8	TNFAIP8L1	ENSGALG00000004266	0.682102	7.14e-276	signal transduction
8	ITSN1	ENSGALG00000036677	0.681591	3.46e-132	signal transduction
8	OLFM1	ENSGALG00000002515	0.677913	4.41e-59	signal transduction
8	ATAD5	ENSGALG00000003294	0.646575	2.91e-173	signal transduction
8	GPC1	ENSGALG00000040316	0.599781	1.63e-113	signal transduction
8	SPDL1	ENSGALG00000001942	0.597728	4.5e-193	signal transduction
8	DEPDC1B	ENSGALG00000014729	0.594807	0	signal transduction	cell-cell signaling
8	DKK3	ENSGALG00000005551	0.593137	1.06e-97	signal transduction	cell-cell signaling
8	BNAS2		0.590259	3.63e-136	signal transduction
8	PHLDA2	ENSGALG00000032687	0.587538	3.39e-72	signal transduction
8	MELK	ENSGALG00000016438	0.57578	0	signal transduction
8	HOXB7	ENSGALG00000032740	0.57248	2.33e-181			DNA-binding transcription factor activity
8	SOD1	ENSGALG00000015844	0.567861	6.08e-101	signal transduction
8	CIT	ENSGALG00000007354	0.555938	0	signal transduction
8	CIT	ENSGALG00000007354	0.555938	0				transcription factor binding
8	ITGB1	ENSGALG00000007145	0.555002	3.03e-113	signal transduction
8	ITGB1	ENSGALG00000007145	0.555002	3.03e-113		cell-cell signaling
8	LMO4	ENSGALG00000006252	0.551681	3.42e-72				transcription factor binding
8	LGMN	ENSGALG00000010811	0.547524	2.34e-106	signal transduction	cell-cell signaling
8	MSX1	ENSGALG00000015013	0.545408	2.17e-143	signal transduction		DNA-binding transcription factor activity
8	KIF14	ENSGALG00000002175	0.545322	0	signal transduction
8	IFT20	ENSGALG00000005707	0.522266	4.17e-98	signal transduction	cell-cell signaling
8	PTN	ENSGALG00000040493	0.522047	2.88e-101	signal transduction	cell-cell signaling
8	DEPDC1	ENSGALG00000011275	0.516455	0	signal transduction
8	TNFSF10	ENSGALG00000009179	0.511786	4.56e-123	signal transduction
8	GNG5	ENSGALG00000027561	0.510709	3.49e-90	signal transduction
8	CLSPN	ENSGALG00000002346	0.501463	1.97e-220	signal transduction
8	RAB4A	ENSGALG00000036218	0.495597	1.77e-100	signal transduction
8	ITGB5	ENSGALG00000029766	0.492648	3.23e-106	signal transduction
8	RELN	ENSGALG00000008193	0.491028	2.17e-79	signal transduction	cell-cell signaling
8	PDZD11	ENSGALG00000004198	0.485373	5.2e-142		cell-cell signaling
8	JUN	ENSGALG00000010870	0.478217	1.55e-12	signal transduction		DNA-binding transcription factor activity	transcription factor binding
8	RASSF1	ENSGALG00000038951	0.472039	1.09e-111	signal transduction
8	CD81	ENSGALG00000006546	0.471499	7.01e-78	signal transduction
8	YBX3	ENSGALG00000031890	0.459746	1.23e-59	signal transduction
8	IL1RAP	ENSGALG00000007253	0.458746	6.73e-57	signal transduction	cell-cell signaling
8	SOX10	ENSGALG00000012290	0.458619	4.03e-75	signal transduction	cell-cell signaling	DNA-binding transcription factor activity
8	NR2F2	ENSGALG00000007000	0.457991	2.96e-58	signal transduction		DNA-binding transcription factor activity
8	RPA4		0.45787	1.84e-100	signal transduction
8	RHEB	ENSGALG00000039880	0.453524	2.21e-94	signal transduction
8	DNA2	ENSGALG00000004037	0.447479	3.94e-227	signal transduction
8	ENSGALG00000004515	ENSGALG00000004515	0.446206	1.38e-291	signal transduction
8	ITGA6	ENSGALG00000034007	0.441442	3.4e-93	signal transduction
8	ERLIN2	ENSGALG00000003092	0.439471	1.21e-83	signal transduction
8	NDUFA13	ENSGALG00000039212	0.437412	2.2e-69	signal transduction
8	HSPD1	ENSGALG00000008094	0.436887	4.87e-61	signal transduction
8	TFDP2	ENSGALG00000025759	0.43332	3.4e-89			DNA-binding transcription factor activity
8	SIVA1	ENSGALG00000011619	0.425547	2.74e-80	signal transduction
8	GCLM	ENSGALG00000005782	0.419876	4.32e-70	signal transduction
8	KPNB1	ENSGALG00000036962	0.412827	4.61e-68	signal transduction
8	TRAIP	ENSGALG00000002908	0.411678	4.82e-300	signal transduction
8	DEPDC7	ENSGALG00000011681	0.410695	2.24e-99	signal transduction
8	TICRR	ENSGALG00000006631	0.408967	7.72e-162	signal transduction
8	PHPT1	ENSGALG00000039061	0.390425	1.89e-74	signal transduction
8	YWHAH	ENSGALG00000006743	0.388532	9.61e-67	signal transduction			transcription factor binding
8	VLDLR	ENSGALG00000010166	0.388441	6.22e-41	signal transduction
8	P4HB	ENSGALG00000038290	0.387602	2.11e-62	signal transduction
8	HMGN3		0.38695	2.82e-94		cell-cell signaling
8	CYR61	ENSGALG00000008661	0.384788	1.45e-25	signal transduction
8	HDGF	ENSGALG00000032847	0.382939	8.05e-49				transcription factor binding
8	CNTN2	ENSGALG00000000653	0.382032	1.25e-49	signal transduction	cell-cell signaling
8	CTNNA1	ENSGALG00000002447	0.381469	1.28e-87	signal transduction
8	CCNA2	ENSGALG00000011881	0.380868	5.13e-279	signal transduction
8	HELLS	ENSGALG00000005451	0.378334	3.76e-92	signal transduction
8	ENSGALG00000048936	ENSGALG00000048936	0.377545	6.83e-141	signal transduction
8	FRZB	ENSGALG00000002763	0.372058	5.55e-78	signal transduction	cell-cell signaling
8	ARF6	ENSGALG00000026944	0.363678	1.9e-59	signal transduction
8	TIMP3	ENSGALG00000028627	0.362445	1.17e-47	signal transduction
8	RALB	ENSGALG00000026493	0.359237	1.27e-66	signal transduction
8	SFPQ	ENSGALG00000002514	0.358975	5.27e-47	signal transduction
8	CHCHD2		0.356691	1.26e-55				transcription factor binding
8	TULP3	ENSGALG00000013424	0.356485	8.18e-88	signal transduction
8	E2F8	ENSGALG00000041299	0.355966	1.88e-167			DNA-binding transcription factor activity
8	LFNG	ENSGALG00000038515	0.354545	4.49e-34	signal transduction
8	EIF4EBP1	ENSGALG00000003205	0.354065	6.55e-51	signal transduction
8	TRIP13	ENSGALG00000033834	0.351237	1.26e-176	signal transduction
8	SEC14L1	ENSGALG00000001684	0.349019	3.32e-46	signal transduction
8	CALR	ENSGALG00000040368	0.346912	4.67e-56	signal transduction			transcription factor binding
8	NONO	ENSGALG00000005507	0.343995	9.18e-56	signal transduction
8	FOS	ENSGALG00000028037	0.342515	5.43e-05	signal transduction		DNA-binding transcription factor activity	transcription factor binding
8	SASH1	ENSGALG00000012342	0.339908	4.17e-64	signal transduction
8	LRPAP1	ENSGALG00000015612	0.339618	9.97e-60	signal transduction
8	FYN	ENSGALG00000015022	0.337432	7.06e-52	signal transduction	cell-cell signaling
8	PACSIN2	ENSGALG00000014159	0.334736	3.77e-68		cell-cell signaling
8	MPC2	ENSGALG00000015437	0.33044	3.61e-52		cell-cell signaling
8	SMARCC1	ENSGALG00000032642	0.325158	3.36e-44	signal transduction
8	HNRNPU	ENSGALG00000010671	0.324191	7.76e-41				transcription factor binding
8	GPSM2	ENSGALG00000002090	0.321146	1.98e-169	signal transduction
8	CTCFL		0.32046	1.42e-52			DNA-binding transcription factor activity	transcription factor binding
8	CALM2	ENSGALG00000010023	0.320376	1.53e-86	signal transduction
8	NCAPG2	ENSGALG00000006525	0.317236	4.71e-277				transcription factor binding
8	IQGAP1	ENSGALG00000030162	0.316628	4.18e-66	signal transduction
8	TGFBR2	ENSGALG00000011442	0.316394	1.16e-72	signal transduction
8	CBX5	ENSGALG00000036856	0.316131	5.71e-110				transcription factor binding
8	PARP1	ENSGALG00000009228	0.315176	3.39e-45				transcription factor binding
8	MSH2	ENSGALG00000008962	0.313287	2.9e-62	signal transduction
8	SHCBP1	ENSGALG00000004444	0.312745	0	signal transduction
8	ENSGALG00000007007	ENSGALG00000007007	0.311498	3.59e-79	signal transduction
8	MSH6	ENSGALG00000008957	0.307301	3.62e-38	signal transduction
8	HOXB8	ENSGALG00000040320	0.304951	3.56e-120			DNA-binding transcription factor activity
8	GPC4	ENSGALG00000006080	0.304237	1.67e-41	signal transduction	cell-cell signaling
8	GKAP1	ENSGALG00000012586	0.302239	4.91e-74	signal transduction
8	ARHGAP18	ENSGALG00000031843	0.300327	1.62e-57	signal transduction
8	PDGFA	ENSGALG00000003642	0.299637	6.15e-76	signal transduction
8	RGL1	ENSGALG00000004728	0.298943	4e-60	signal transduction
8	DAB1	ENSGALG00000010857	0.298188	3.08e-64	signal transduction
8	RUVBL2	ENSGALG00000036359	0.296232	2.79e-60	signal transduction	cell-cell signaling		transcription factor binding
8	TMCO1	ENSGALG00000033460	0.293132	3.52e-45	signal transduction
8	RAC1	ENSGALG00000007130	0.290156	1.19e-50	signal transduction
8	RTKN2	ENSGALG00000002980	0.289514	0	signal transduction
8	BCL2L10	ENSGALG00000030871	0.287211	1.19e-53	signal transduction
8	ITGAV	ENSGALG00000002655	0.286293	2.14e-53	signal transduction
8	RGS7BP	ENSGALG00000027389	0.285133	5.49e-55	signal transduction
8	RUVBL1	ENSGALG00000005931	0.282689	2.3e-46	signal transduction	cell-cell signaling		transcription factor binding
8	CENPJ	ENSGALG00000017148	0.281846	1.23e-177	signal transduction
8	SNX3	ENSGALG00000015304	0.281529	6.21e-39	signal transduction	cell-cell signaling
8	TFAP2A	ENSGALG00000012775	0.28106	1.08e-66			DNA-binding transcription factor activity
8	RASSF8	ENSGALG00000054273	0.280866	1.7e-88	signal transduction
8	ZFYVE19	ENSGALG00000008460	0.277834	3.5e-77	signal transduction
8	HOXA9	ENSGALG00000028983	0.277813	1.7e-94			DNA-binding transcription factor activity
8	MBP	ENSGALG00000013640	0.276079	8.54e-26	signal transduction
8	THRAP3	ENSGALG00000002144	0.275738	1.58e-38				transcription factor binding
8	HTRA1	ENSGALG00000041140	0.274474	2.48e-77	signal transduction
8	SNCA	ENSGALG00000010379	0.27054	7.2e-56	signal transduction	cell-cell signaling
8	EFNB1	ENSGALG00000036539	0.270435	1.84e-42	signal transduction
8	RASSF9	ENSGALG00000027633	0.268896	2.09e-61	signal transduction
8	IL1RAPL2	ENSGALG00000008888	0.268285	1.58e-72	signal transduction
8	HSP90AA1	ENSGALG00000033212	0.267129	8.02e-24	signal transduction
8	SERINC3	ENSGALG00000004220	0.266536	3.78e-60	signal transduction
8	BRD8	ENSGALG00000037646	0.265504	1.05e-61				transcription factor binding
8	UACA	ENSGALG00000034100	0.263916	3.5e-48	signal transduction
8	NPB	ENSGALG00000044431	0.262375	2.45e-52	signal transduction
8	SKP2	ENSGALG00000003547	0.260098	3.89e-50	signal transduction
8	CHMP6	ENSGALG00000026428	0.257578	5.09e-41	signal transduction
8	RAP1B	ENSGALG00000009927	0.256344	4.79e-31	signal transduction
8	RAP1B	ENSGALG00000009927	0.256344	4.79e-31		cell-cell signaling
8	TXNDC17	ENSGALG00000027950	0.256129	8.01e-33	signal transduction
8	TFDP1	ENSGALG00000016823	0.255563	3.56e-47			DNA-binding transcription factor activity	transcription factor binding
8	AIDA	ENSGALG00000009426	0.255039	1.57e-46	signal transduction
8	FSTL3	ENSGALG00000042356	0.253454	3.42e-78	signal transduction
8	45171		0.253097	1.82e-59	signal transduction
8	RNF13	ENSGALG00000010411	0.252987	4.98e-36	signal transduction
8	DAG1	ENSGALG00000037784	0.252309	2.18e-44	signal transduction
8	RASGEF1A	ENSGALG00000002525	0.250999	9.05e-115	signal transduction
8	ROCK1	ENSGALG00000014922	0.250955	2.11e-64	signal transduction
8	GPR37L1	ENSGALG00000000607	0.250115	6.49e-61	signal transduction
