# Supplementary figures and images for: Single-cell profiling coupled with lineage analysis reveals vagal and sacral neural crest contributions to the developing enteric nervous system
Source: eLife journal article supplement (doi:10.7554/elife.79156), 2023-10-25

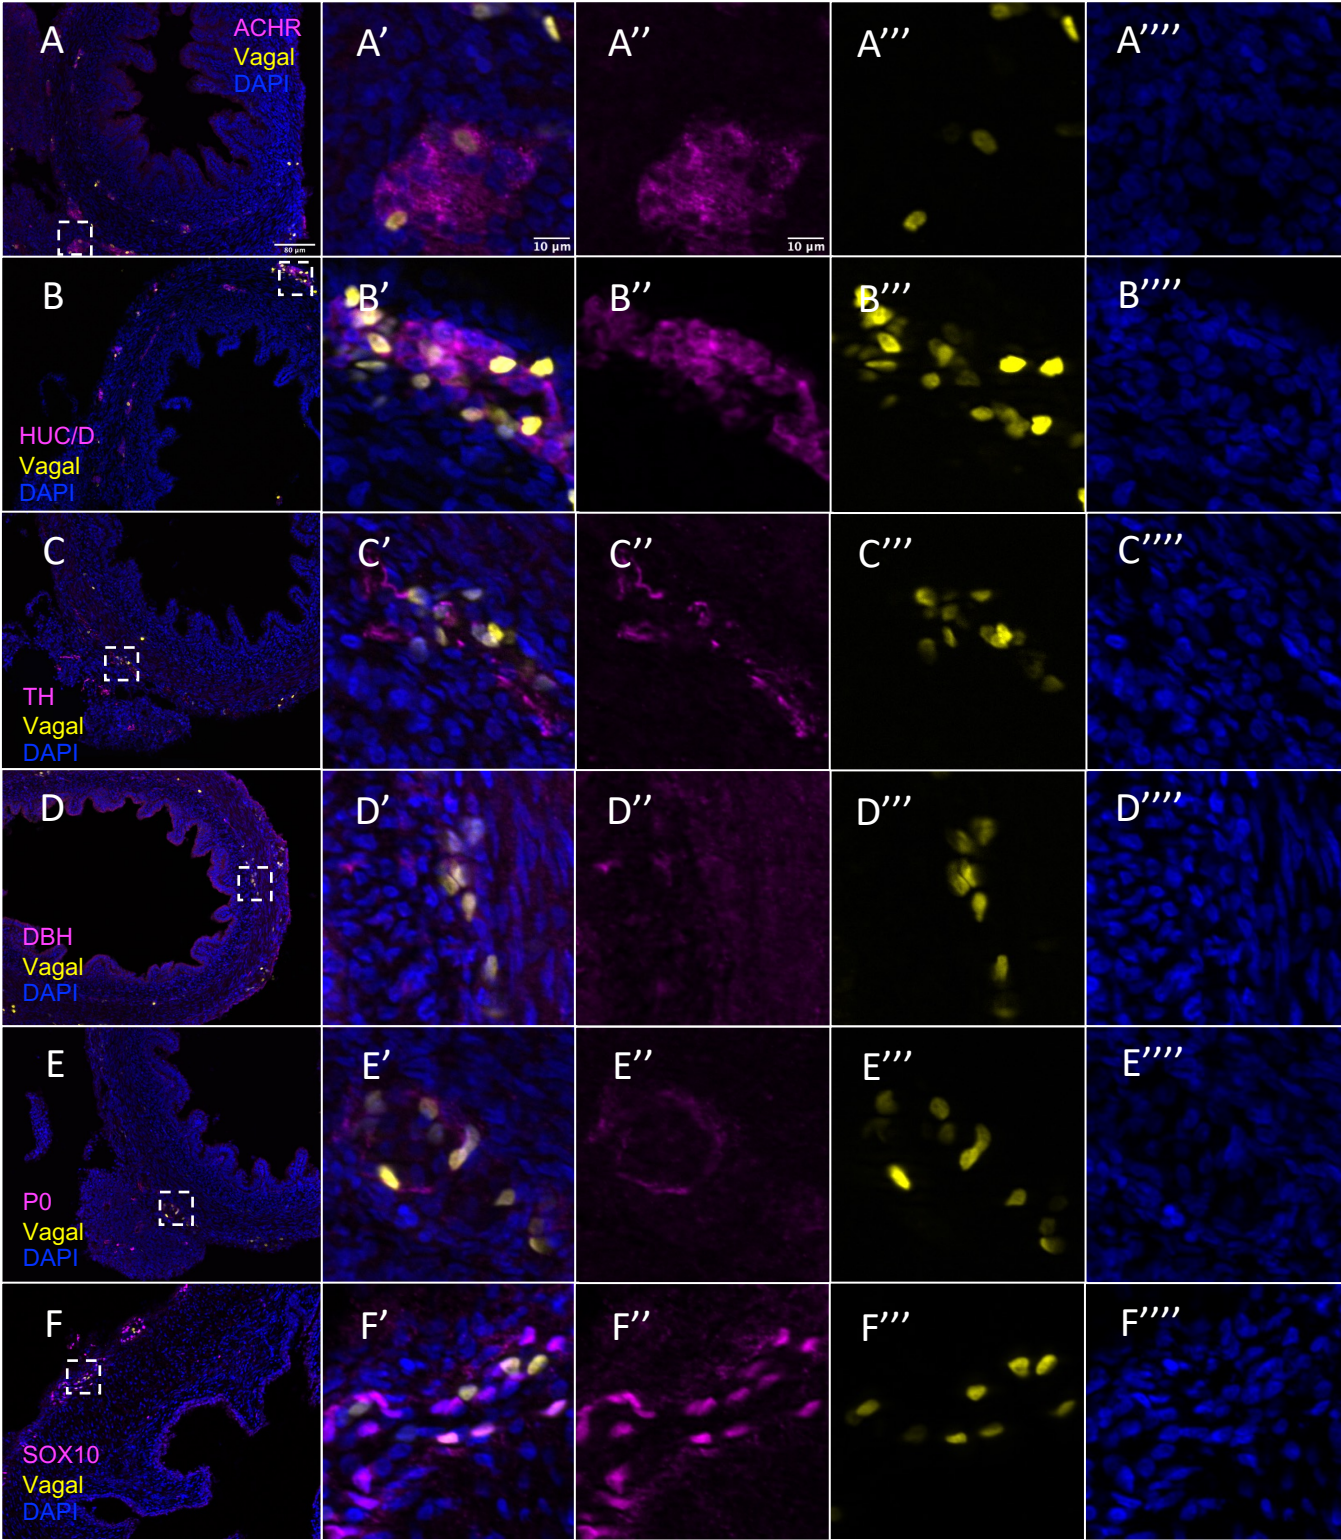

Supplement: supp [file elife-79156-supp-v1.zip]

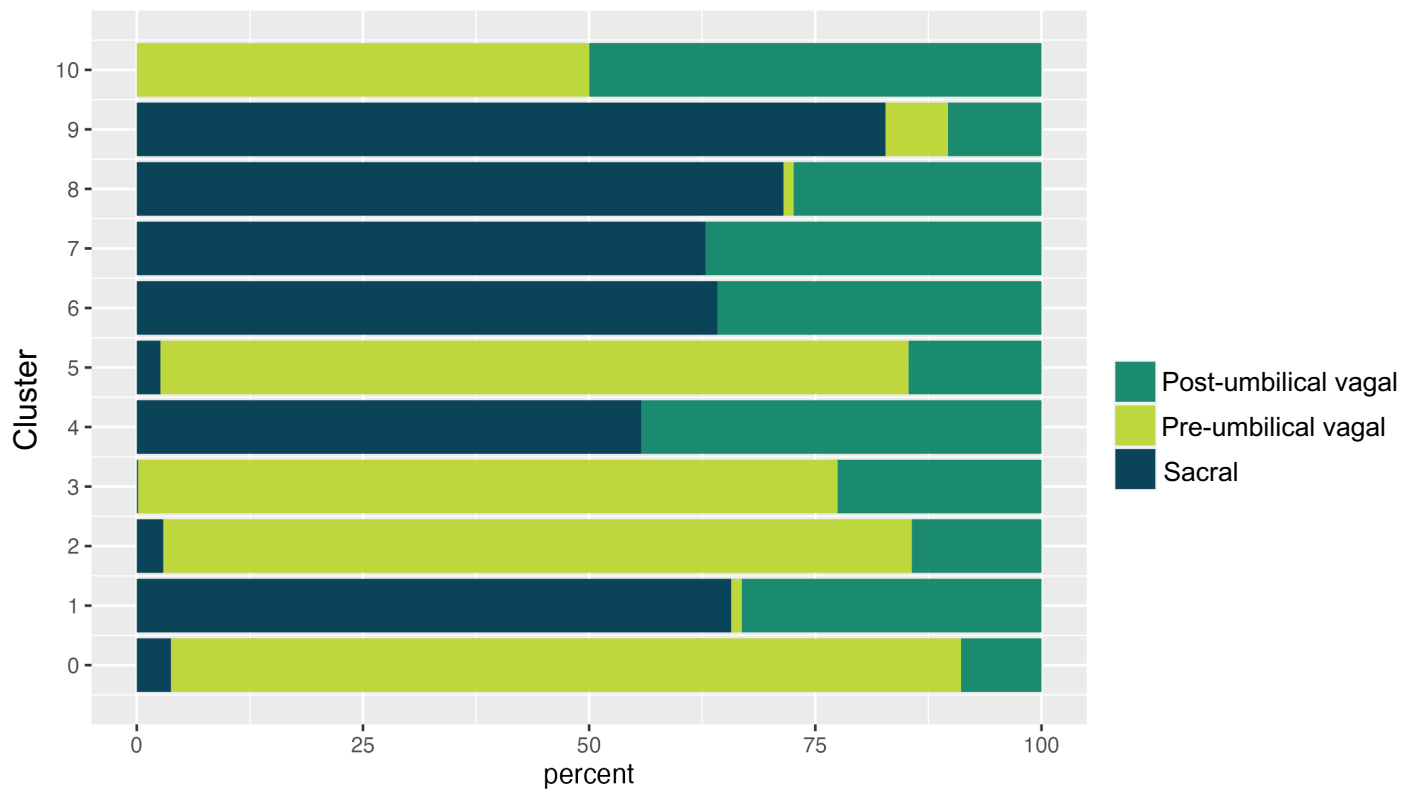

Supplement: supp [file elife-79156-supp-v1.zip]

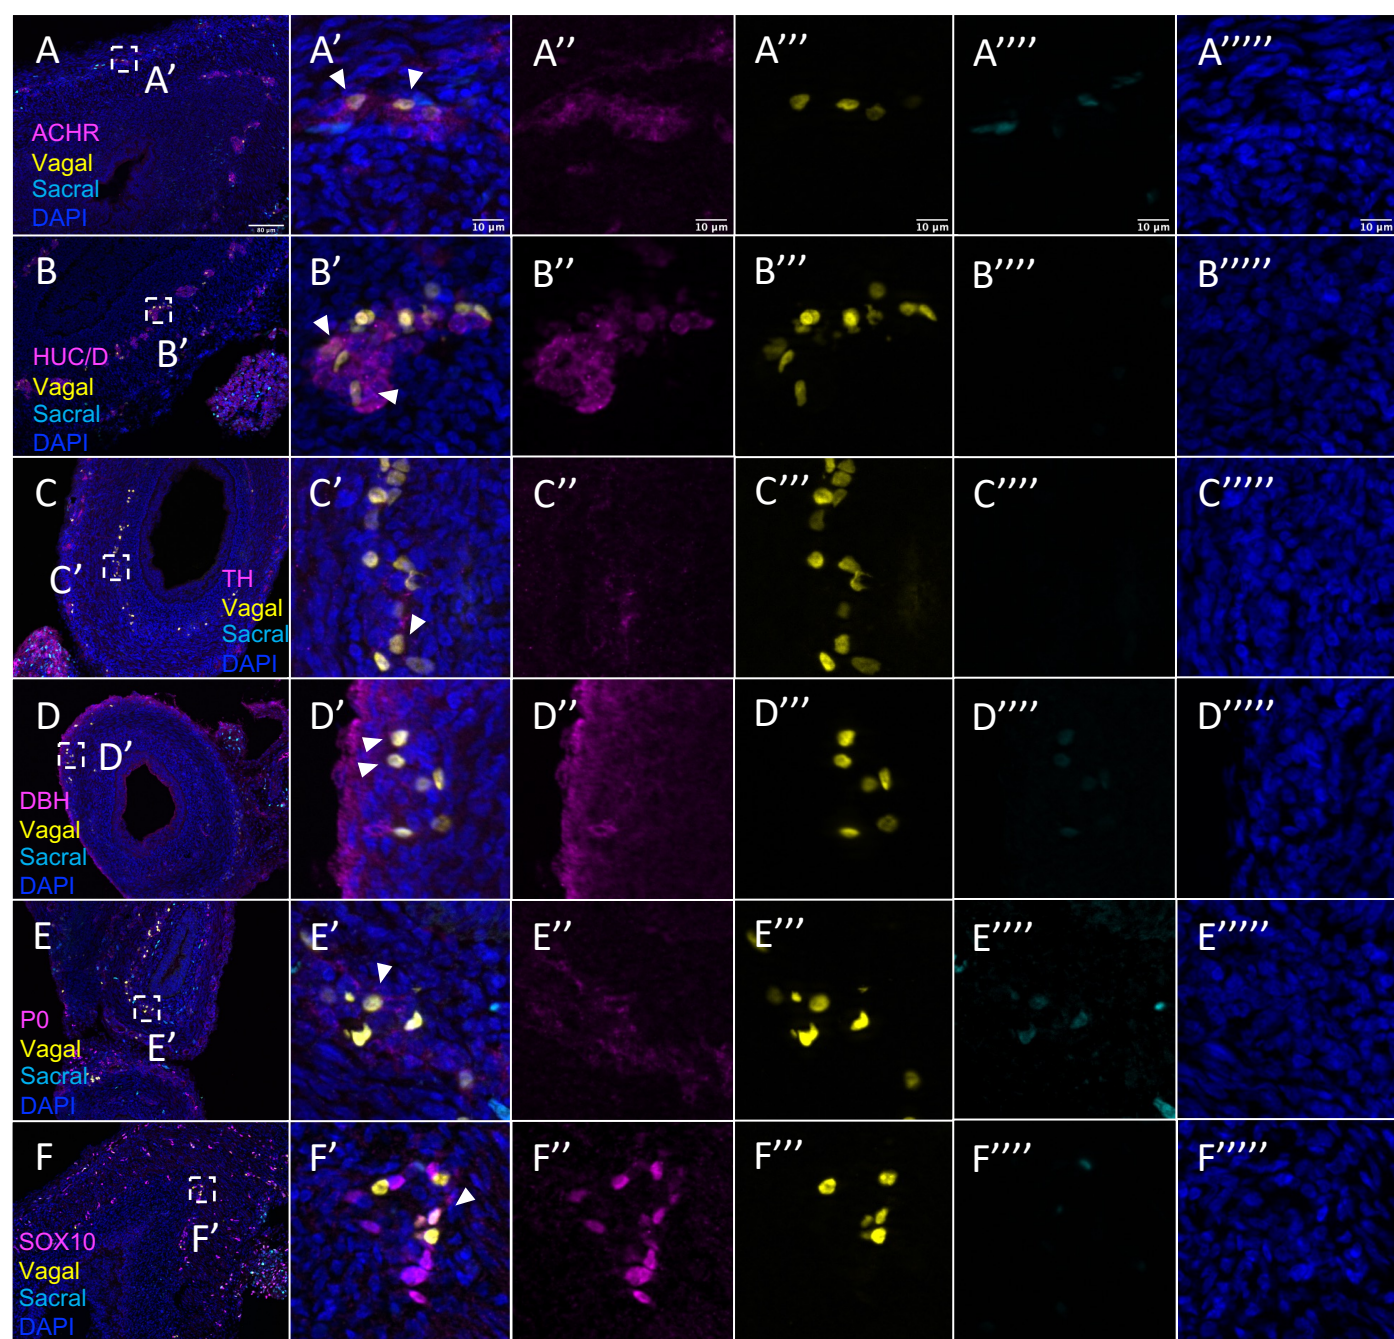

Supplement: supp [file elife-79156-supp-v1.zip]

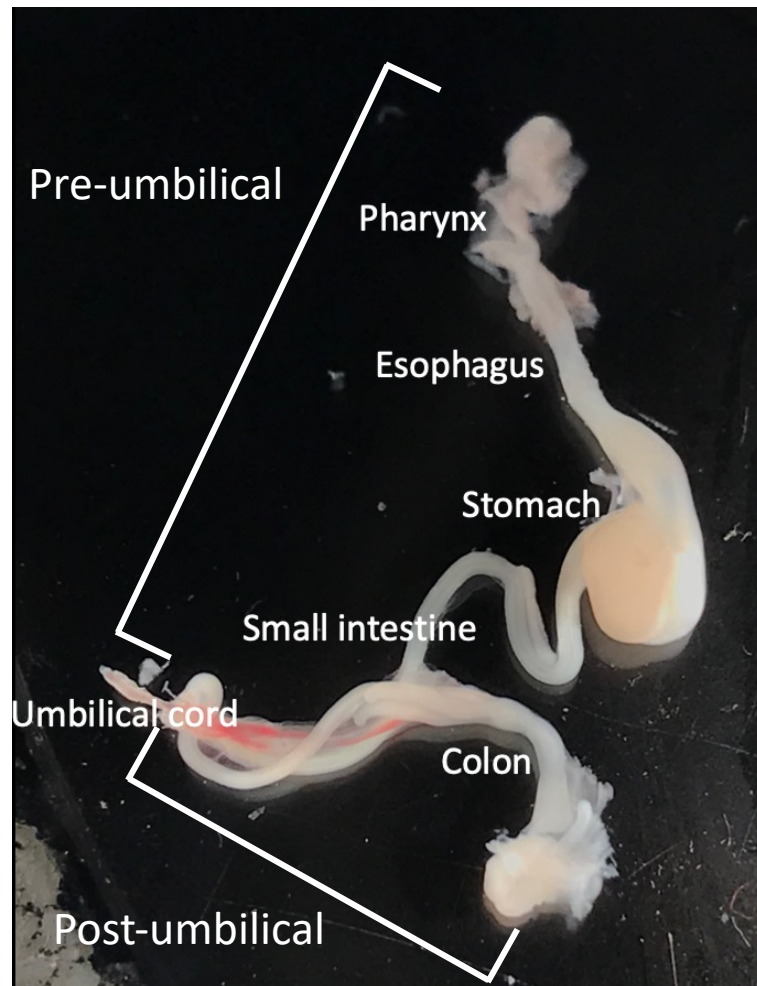

Supplement: supp [file elife-79156-supp-v1.zip]

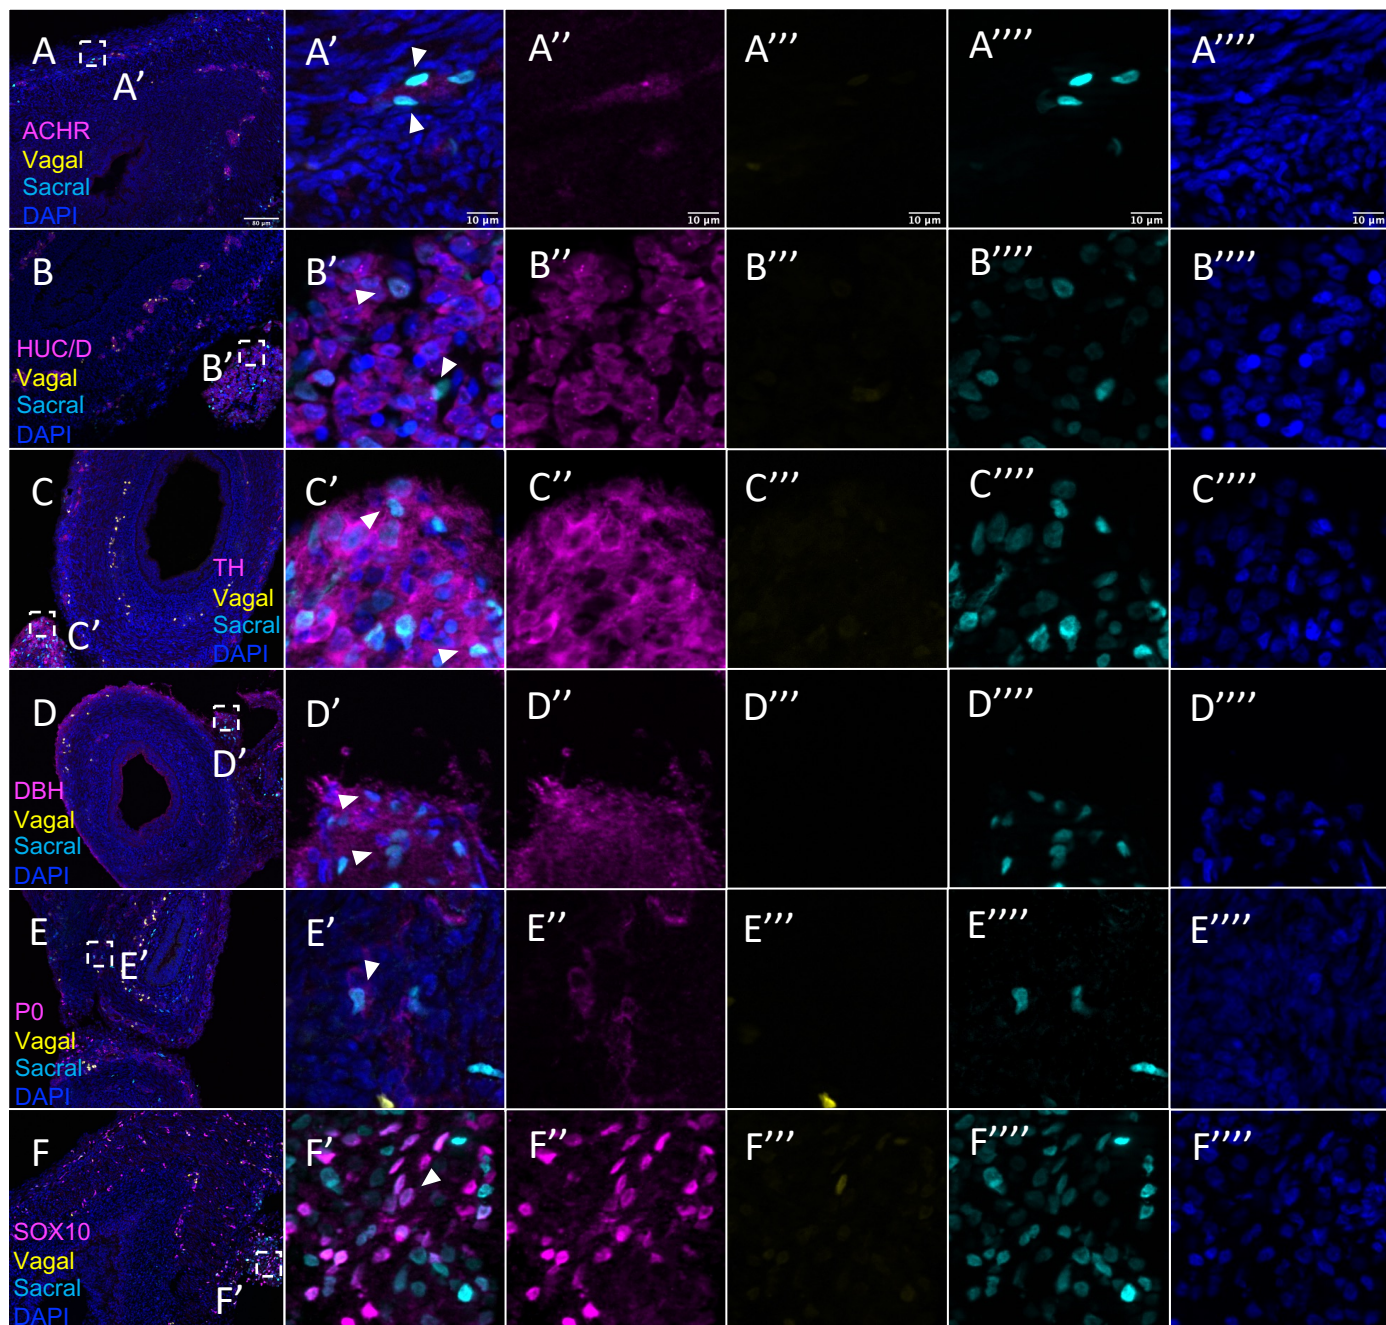

Supplement: supp [file elife-79156-supp-v1.zip]

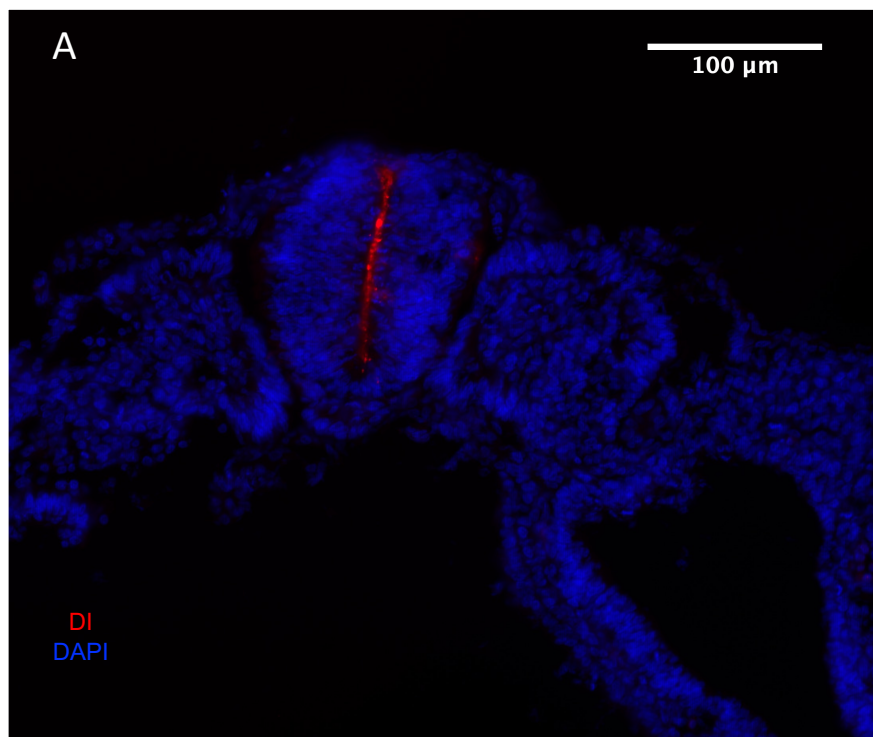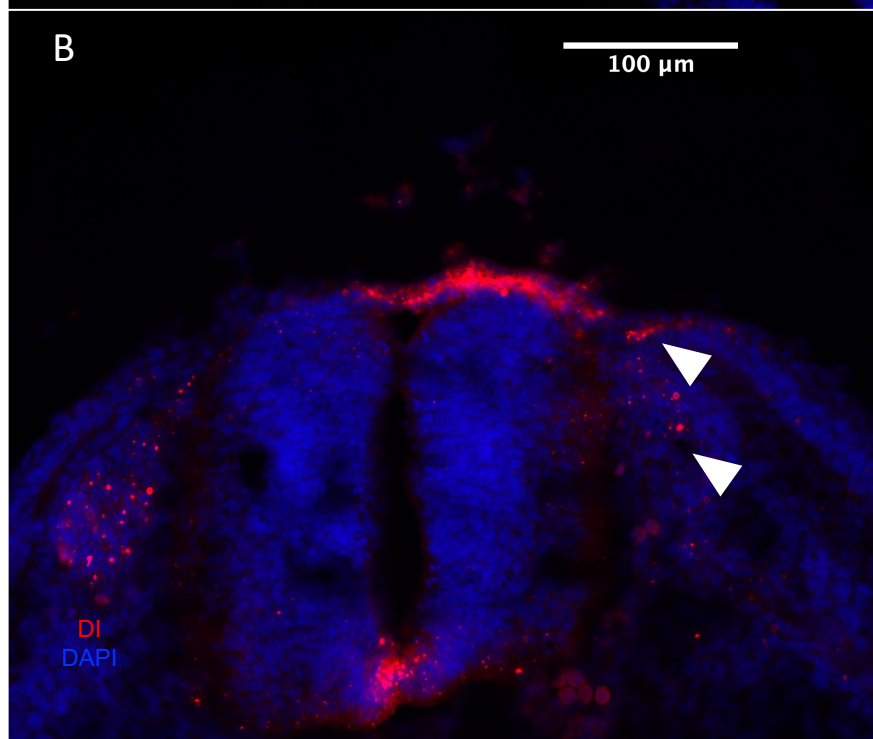

Supplement: supp [file elife-79156-supp-v1.zip]

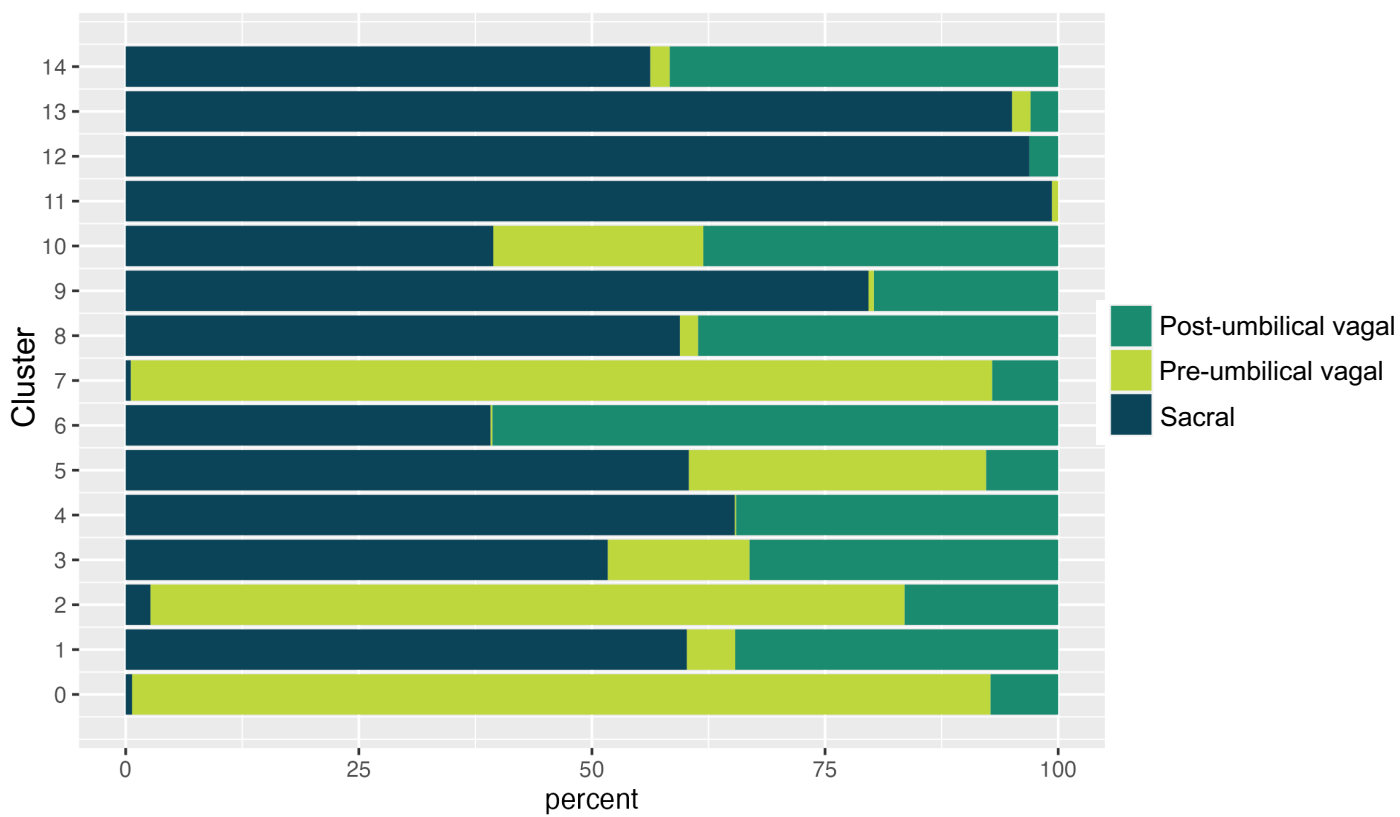

Supplement: supp [file elife-79156-supp-v1.zip]

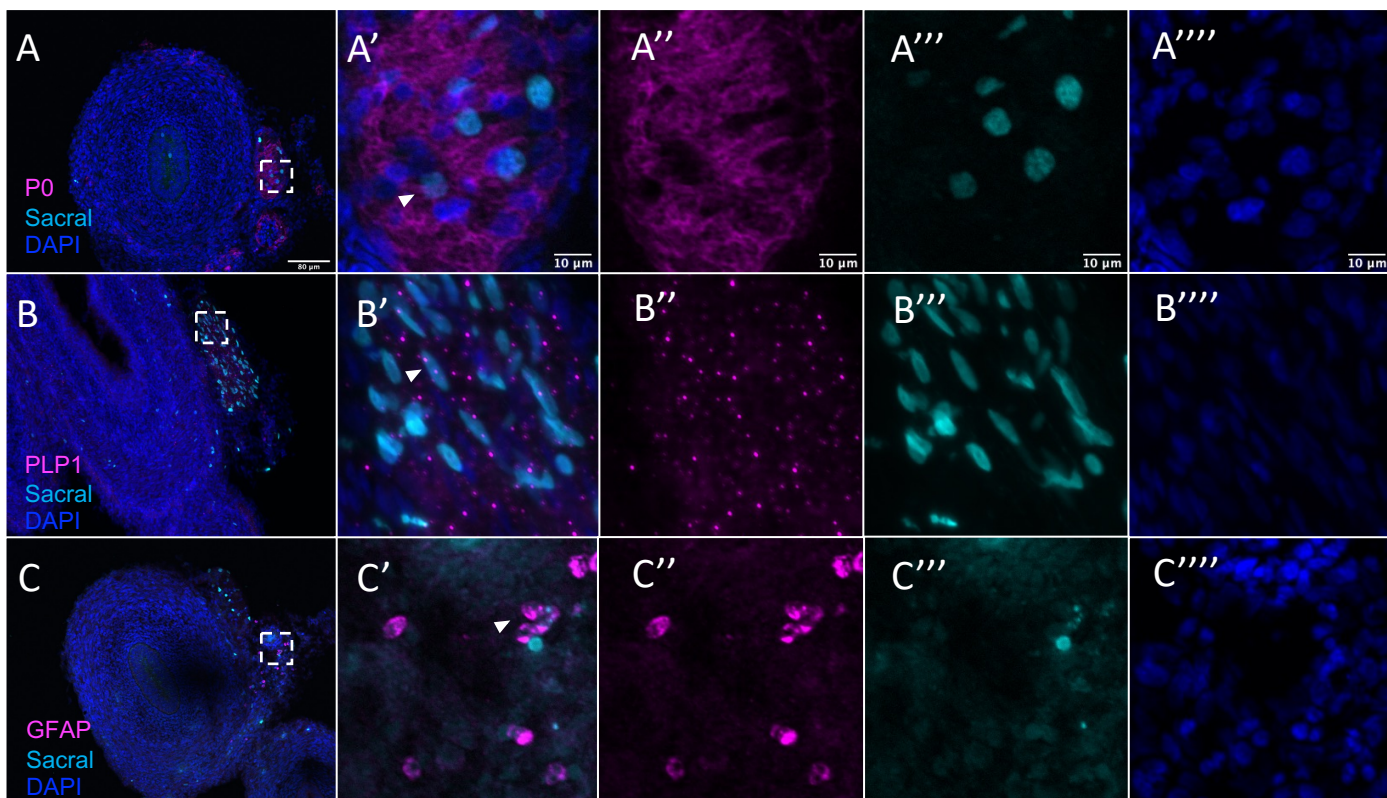

Supplement: supp [file elife-79156-supp-v1.zip]

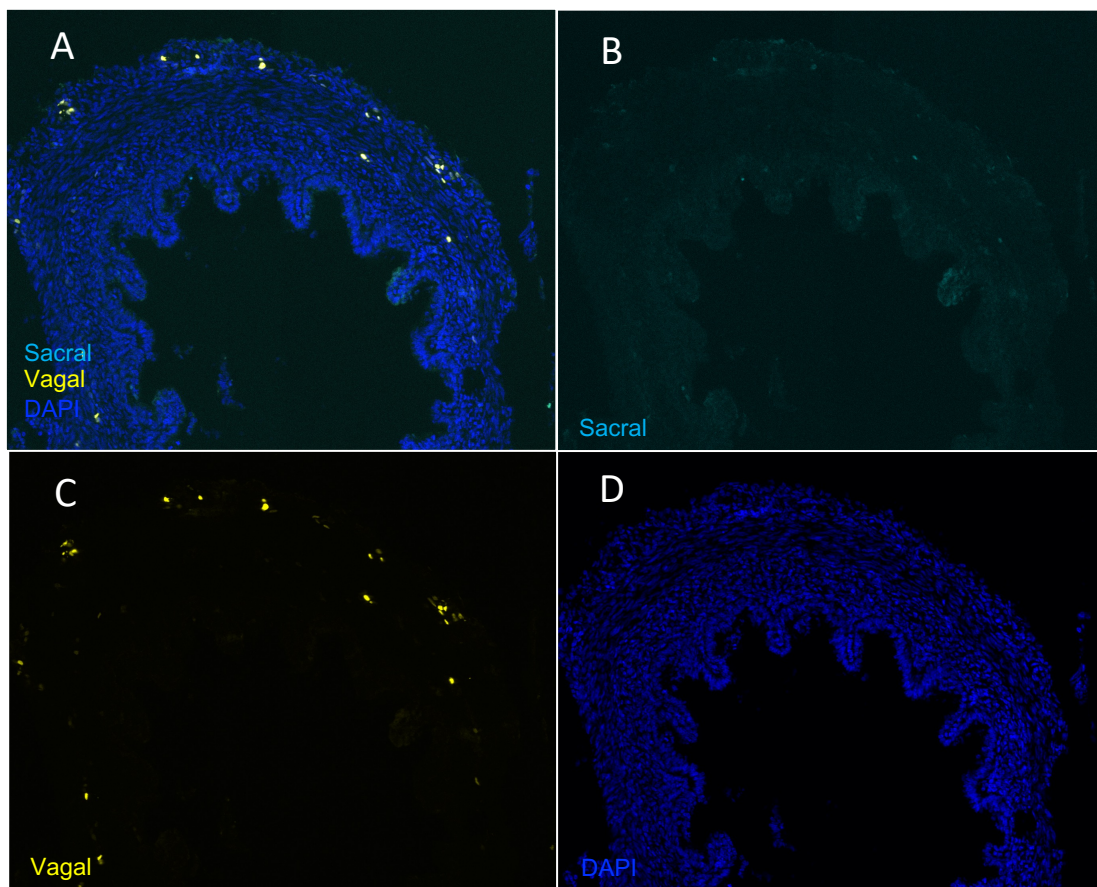

Supplement: supp [file elife-79156-supp-v1.zip]
